# Supplementary material
Source: PubMed Central journal article supplement (PMC3074475)
Supplement: NIHMS282971-supplement-Supplementary_Figures.pdf [file NIHMS282971-supplement-Supplementary_Figures.pdf]

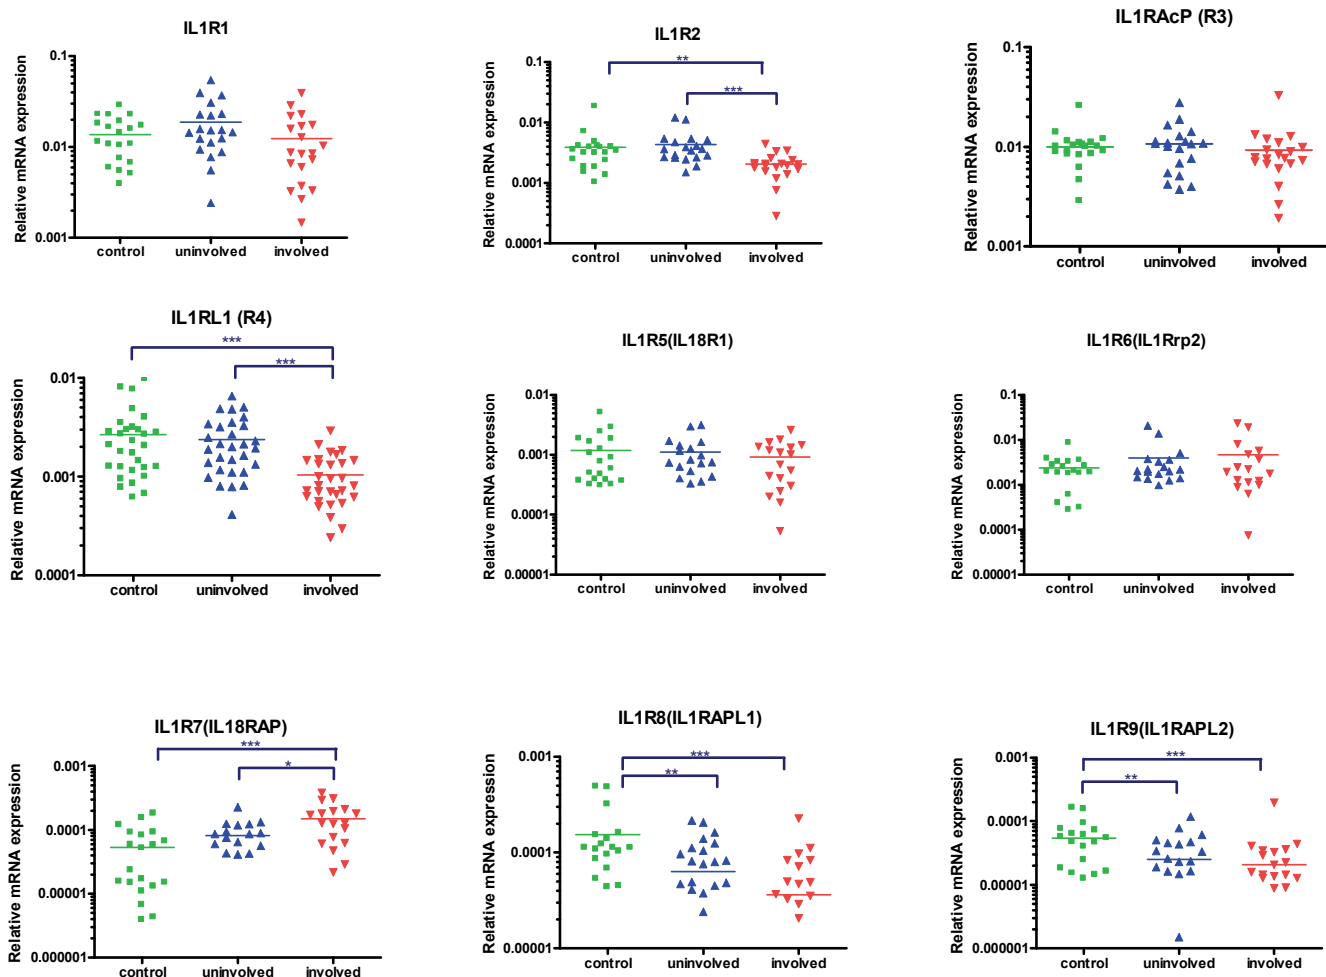

**SUPPLEMENTARY FIGURE 1: mRNA expression the nine known IL-1 receptor genes in biopsies of healthy control, uninvolved and lesional psoriasis skin (n=14-20). Statistical significance indicated \*  $p < 0.05$ , \*\*  $p < 0.01$ , \*\*\*  $p < 0.001$  (2-tailed *t*-test or Mann Whitney test as appropriate).**
